# Supplementary material for: N-Amidothiourea based PET chemosensors for anions
Source: Royal Society of Chemistry journal article supplement (doi:10.1039/b703122j), 2007-01-01

# **ELECTRONIC SUPPLEMENTARY INFORMATION**

## ***N*-Amidothiourea Based PET Chemosensors for Anions**

**Wen-Xia Liu and Yun-Bao Jiang\***

Department of Chemistry, College of Chemistry and Chemical Engineering, and the MOE Key Laboratory of Analytical Sciences, Xiamen University, Xiamen 361005, China

E-mail: [ybjiang@xmu.edu.cn](mailto:ybjiang@xmu.edu.cn); Tel./Fax: +86 592 218 5662

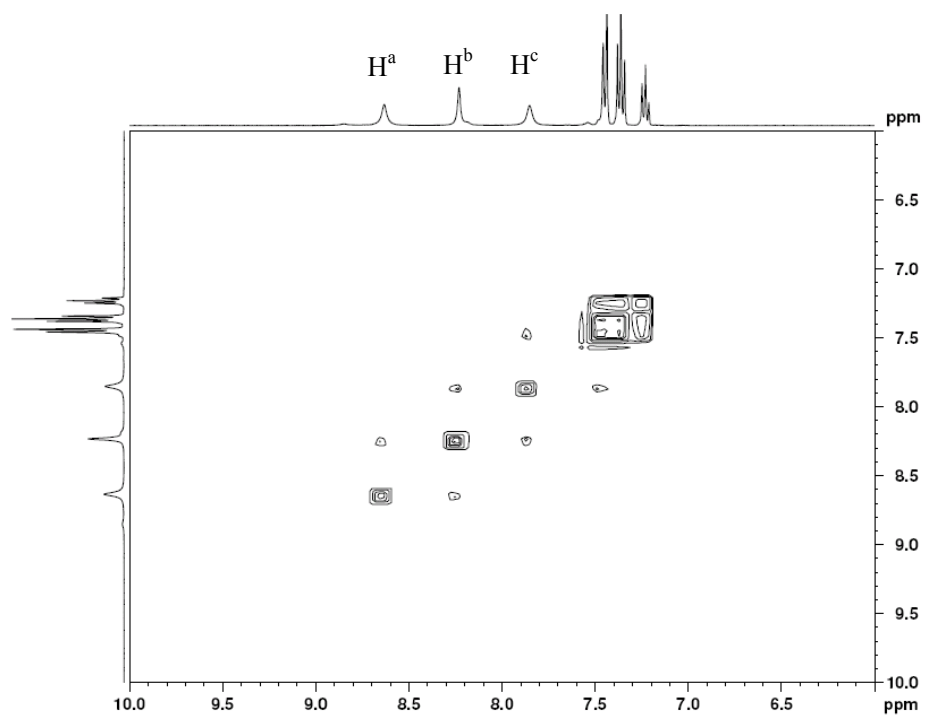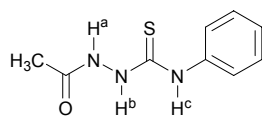

**Figure S1.** Portion of 2D COSY spectrum of *N*-acetamidothiourea and summary of COSY observed in CD<sub>3</sub>CN. This spectrum was taken as a reference for assigning -NH NMR signals of 1-3.

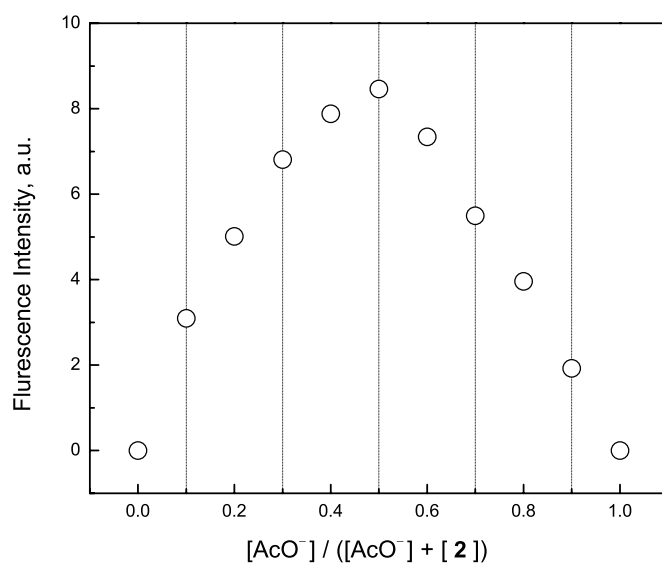

**Figure S2.** Job plot for binding of **2** with  $\text{AcO}^-$  in MeCN. The fluorescence intensity is the difference of fluorescence intensity of  $\text{AcO}^-/2$  mixture and that of **2**. Total concentration of  $\text{AcO}^-$  and **2** is  $8.55 \times 10^{-6} \text{ mol L}^{-1}$ .

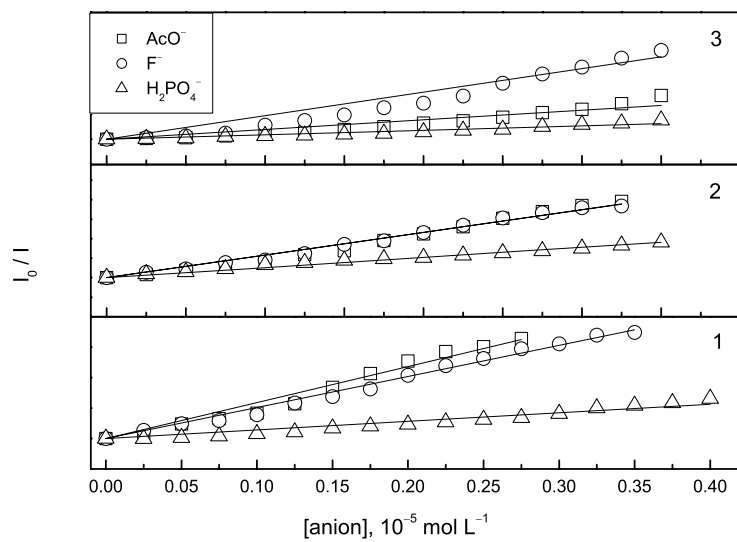

**Figure S3.** Stern-Volmer plots for quenching of sensors **1-3** fluorescence by  $\text{AcO}^-$ ,  $\text{F}^-$  and  $\text{H}_2\text{PO}_4^-$ , respectively, in MeCN

***N*-(1-Pyrenebutanamide)-*N'*-(*p*-tolyl)thiourea (1):**  $^1\text{H}$  NMR (400 MHz,  $\text{DMSO-}d_6$ ).

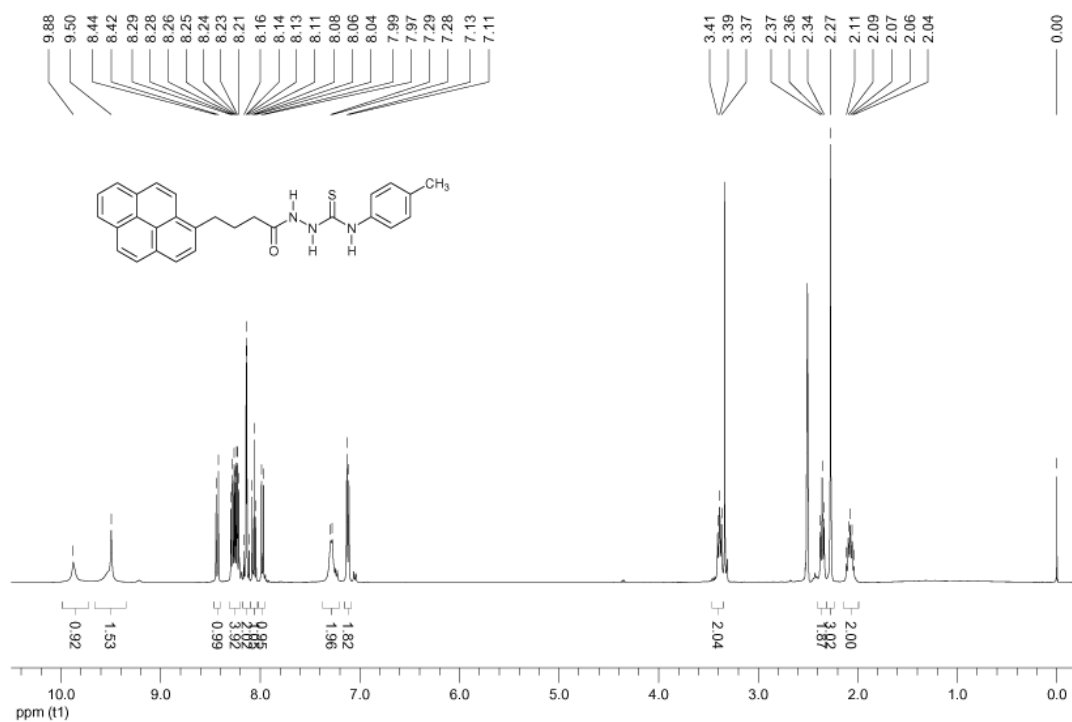

***N*-(1-Pyrenebutanamide)-*N'*-(*p*-tolyl)thiourea (1):**  $^{13}\text{C}$  NMR (100 MHz,  $\text{DMSO-}d_6$ ).

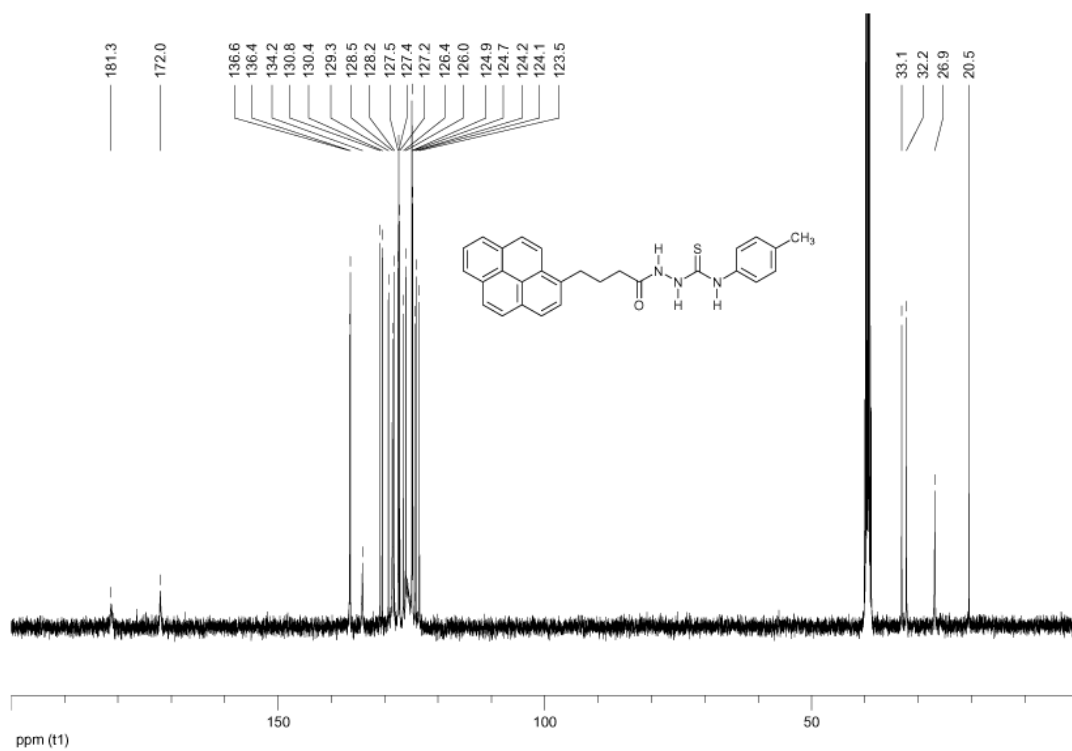

***N*-(1-Pyrenebutanamide)-*N'*-phenylthiourea (2):  $^1\text{H}$  NMR (400 MHz,  $\text{DMSO-}d_6$ ).**

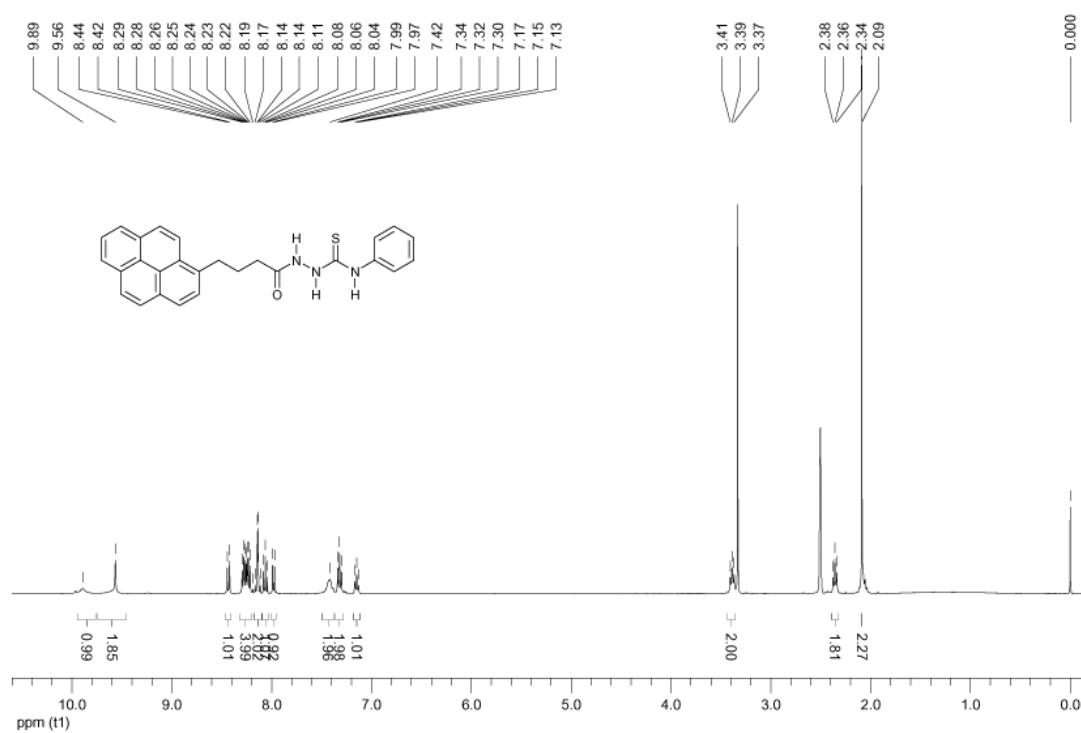

***N*-(1-Pyrenebutanamide)-*N'*-phenylthiourea (2):  $^{13}\text{C}$  NMR (100 MHz,  $\text{DMSO-}d_6$ ).**

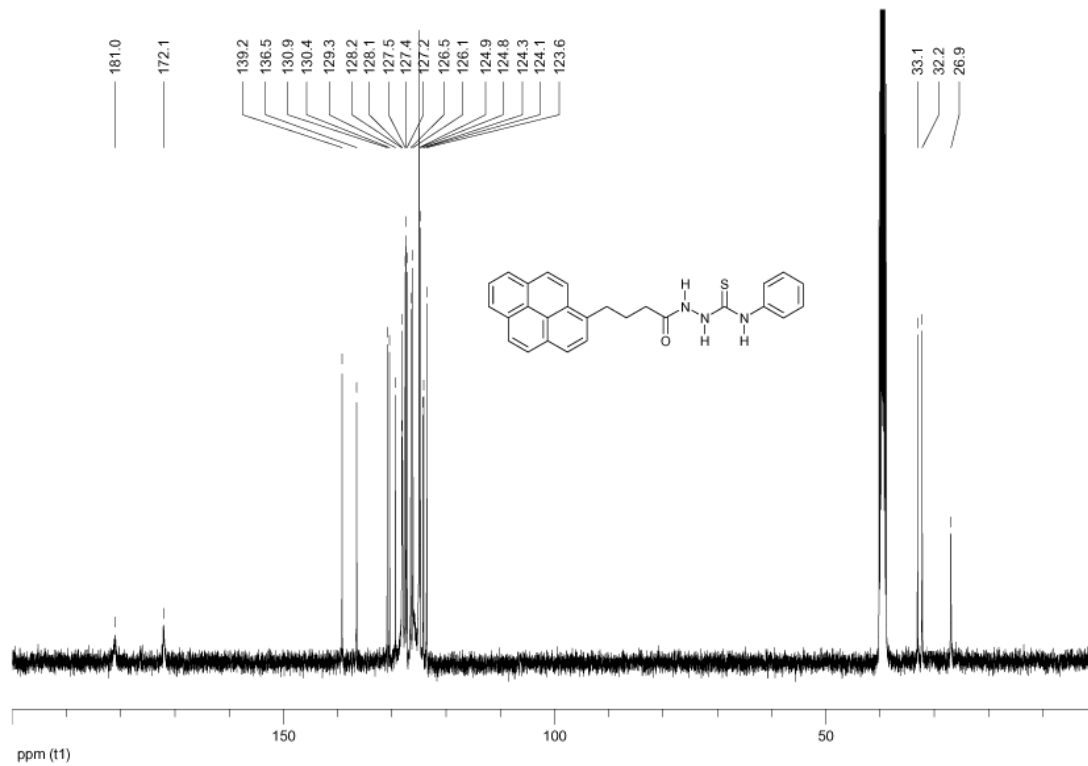

*N*-(1-Pyrenebutanamide)-*N'*-(*m*-trifluoromethylphenyl)thiourea (3):  $^1\text{H}$  NMR (400 MHz,  $\text{DMSO-}d_6$ ).

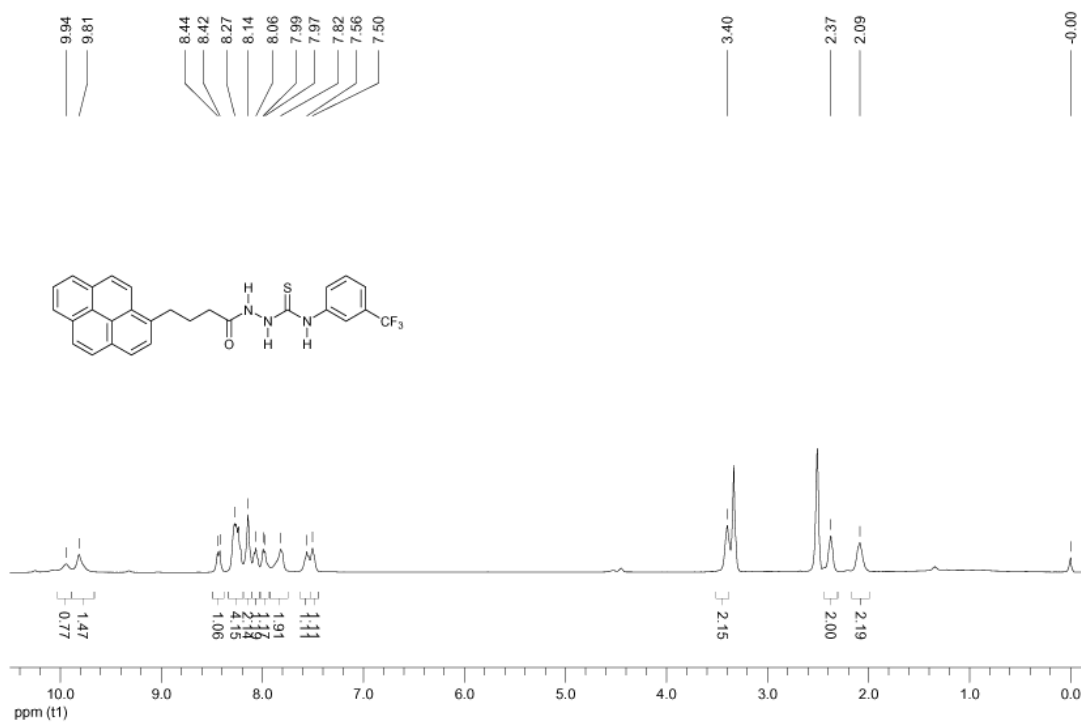

*N*-(1-Pyrenebutanamide)-*N'*-(*m*-trifluoromethylphenyl)thiourea (3):  $^{13}\text{C}$  NMR (100 MHz,  $\text{DMSO-}d_6$ ).

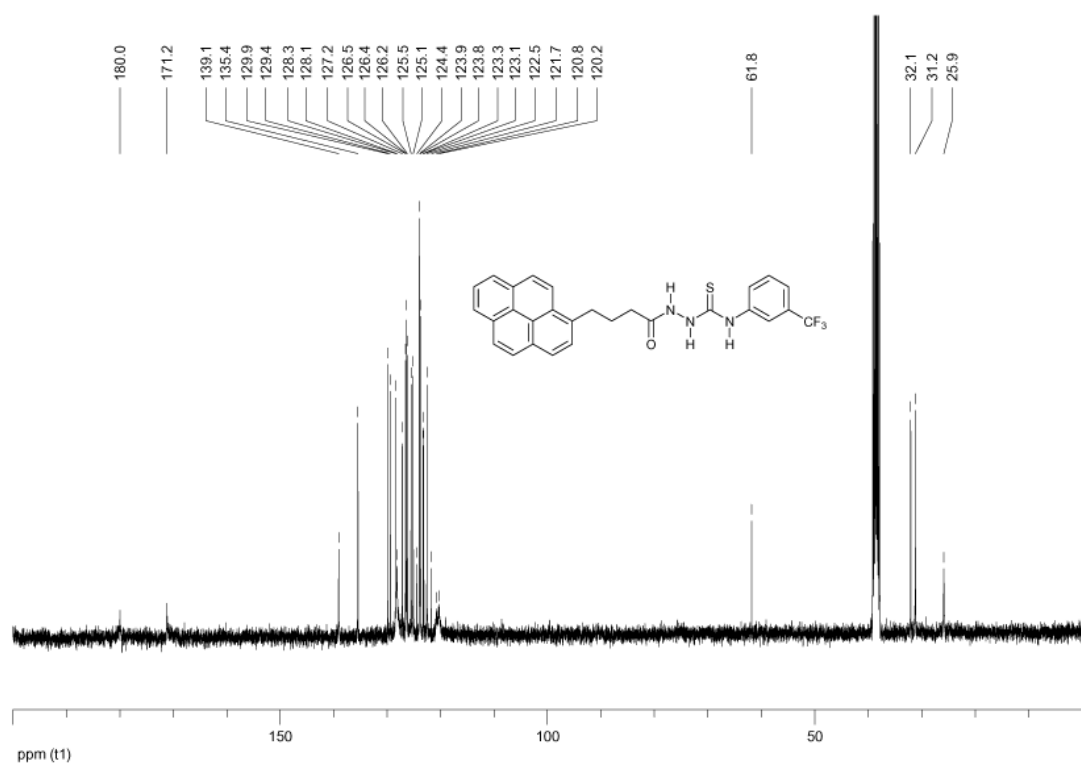

Supplement: b703122j.pdf [file b703122j.pdf]
